# Supplementary material for: NG2 glial cells integrate synaptic input in global and dendritic calcium signals
Source: eLife. 2016 Sep 19;5:e16262. doi: 10.7554/eLife.16262 (PMC5052029; doi:10.7554/eLife.16262)
Supplement: Supplementary file 1. — DOI: http://dx.doi.org/10.7554/eLife.16262.012 [file elife-16262-supp1.xlsx]

## Sheet: Sheet1
Figure# or Section&Paragrah#	N number		Statistical Tests	P value	Note
	value	definition
Results, Para#3	4	4 cells with the bath application of 4-AP	Paired t-test	P = 0.0489 for amplitude; P = 0.0115 for half width	Same raw data set as in Fig. 2B, we averaged the measurement of the 2 time points right before washing in blockers, and averaged the last 2 time points' measurement after washing in the blockers. Then used the 2 averaged values from each cell for Paired t-test.
Results, Para#3	7	7 cells with the bath application of TTX	Paired t-test	P = 0.00097 for amplitude; P = 0.00958 for half width
Results, Para#3	6	6 cells with the bath application of TEA	Paired t-test	P = 0.1866 for amplitude; P = 0.3558 for half width
Fig. 5 E	141	numbers of ROIs from 12 time-lapse series of 7 cells	linear correlation test	P=0.00073	error bars for each distance bin are mean +/- SEM; test was done across all individual data points
Fig. 7 B	Ctr: 40 4-AP: 43	Ctr: 40 trials from 9 cells 4-AP: 43 trials from 7 cells	Fisher's exact test	P = 0.012
Fig. 7 C	Ctr: 9 4-AP: 22	numbers of responding trials	Student's t-test	P = 0.019
Fig. 7 F	4-AP: 43	43 trials from 7 cells	linear correlation test	P = 1.133 * (10)^(-11)	error bars for each bin are mean +/- SEM; test was done across all individual data points
Fig. 7 F	Ctr: 40	40 trials from 9 cells	Paired t-test	P = 0.00315	test was done by pooling all 40 trials together from control group
Fig. 8 G	6	6 dendrites from 2 cells	Paired t-test	P = 0.0725
Fig. 9 D	Ctr:26	26 dendrites from 10 cells	One-Way ANOVA for Correlated Samples, Tukey HSD for post-hoc test	no-stim. VS curr. only: P < 0.05; curr. only VS curr. + uncag.: P > 0.05	the webpage performing this test does not provide exact P values
Fig. 9 D	4-AP: 30	30 dendrites from 16 cells	One-Way ANOVA for Correlated Samples, Tukey HSD for post-hoc test	no-stim. VS curr. only: P < 0.05; curr. only VS curr. + uncag.: P < 0.05
Fig. 10 D	Ctr: 7 4-AP: 8	numbers of cells that have been collected	Student's t-test	P=0.0306
Fig. 10 D	Ctr: 7 Cs + Th: 10	numbers of cells that have been collected	Wilcoxon–Mann–Whitney test	P = 0.02499
Methods - Patch-clamp recordings Para#4	5	5 cells with the bath application of sucrose	Paired t-test	P = 0.3464 for amplitude P = 0.1231 for half width
